# Supplementary material
Source: PubMed Central journal article supplement (PMC10088461)
Supplement: NIHMS1887014-supplement-1.pdf [file NIHMS1887014-supplement-1.pdf]

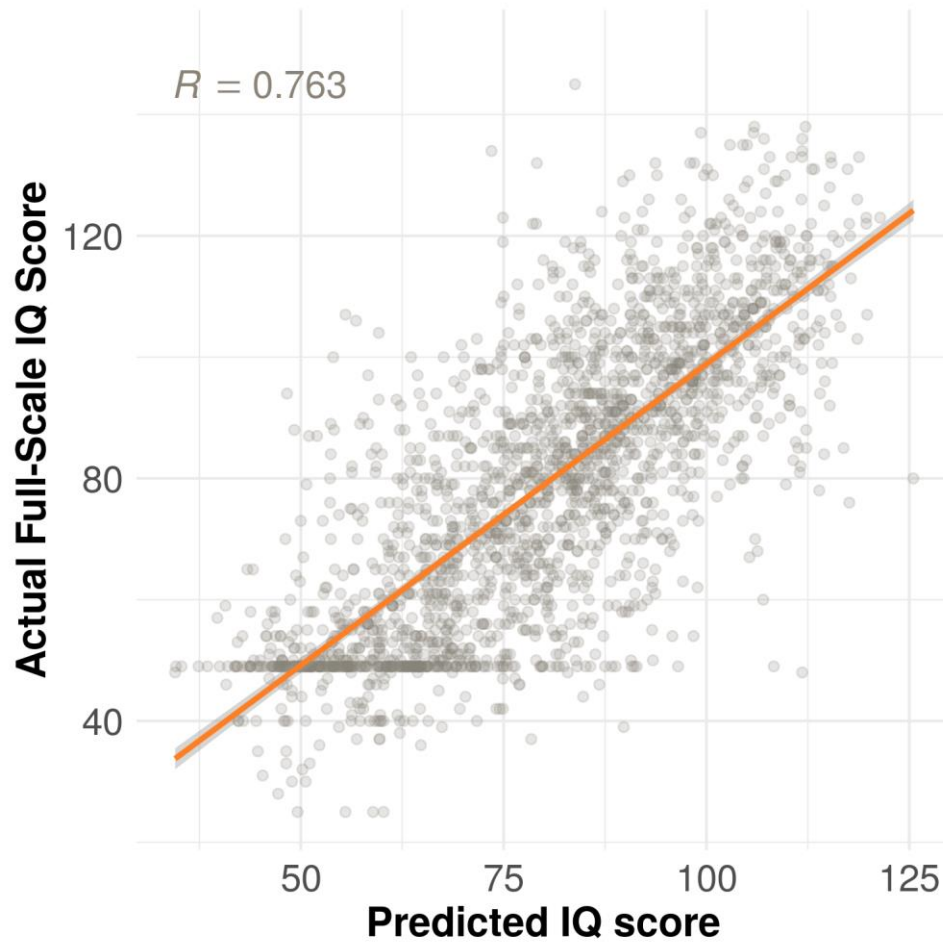

***Supplemental Fig. 1. Predicted IQ scores in SPARK are highly correlated with full-scale IQ scores. Results from a Pearson correlation are plotted.***

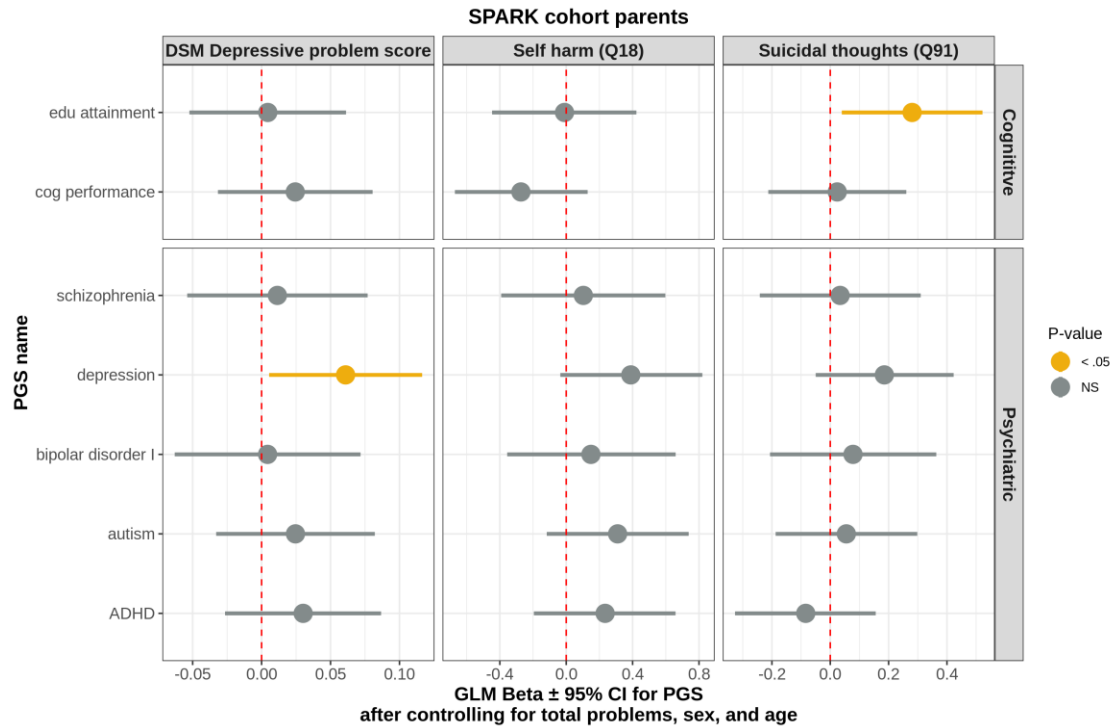

**Supplemental Fig. 2. Polygenic score for educational attainment is predictive of increased suicidal thoughts in parents of autistic children.** Results from generalized linear models predicting the depressive phenotype of interest. The coefficient for the PGS model term  $\pm$  95% confidence interval are plotted. Total DSM problems (except DSM depressive problems), binary sex, and age in months were included as covariates in all models. Compare to Figure 4 (autistic children) in the main text.
